# Supplementary material
Source: PubMed Central journal article supplement (PMC2681007)
Supplement: mmc1.pdf [file mmc1.pdf]

## Supplemental Data

### Genome-wide Insights into the Patterns and Determinants

### of Fine-Scale Population Structure in Humans

Shameek Biswas, Laura B. Scheinfeldt, and Joshua M. Akey

**Figure S1 Intra-continental differentiation within Americas.** The 64 samples are represented as filled circles. The top five PCs are plotted with each panel representing a biplot of consecutive PCs.

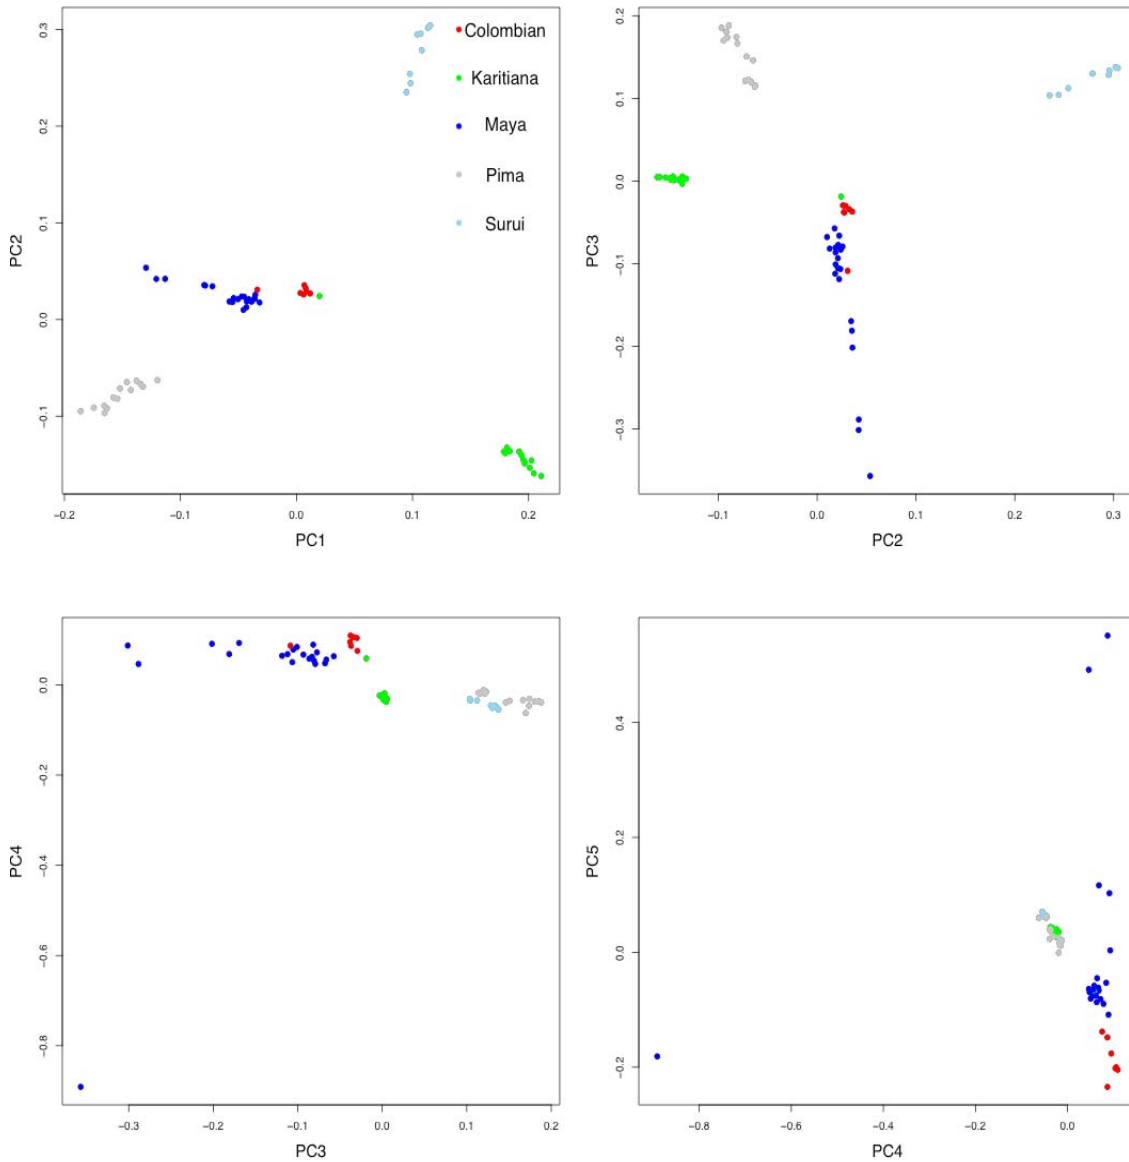

**Figure S2 Intra-continental differentiation within Central/South Asia.** The 201 samples are represented as filled circles. The top five PCs are plotted with each panel representing a biplot of consecutive PCs.

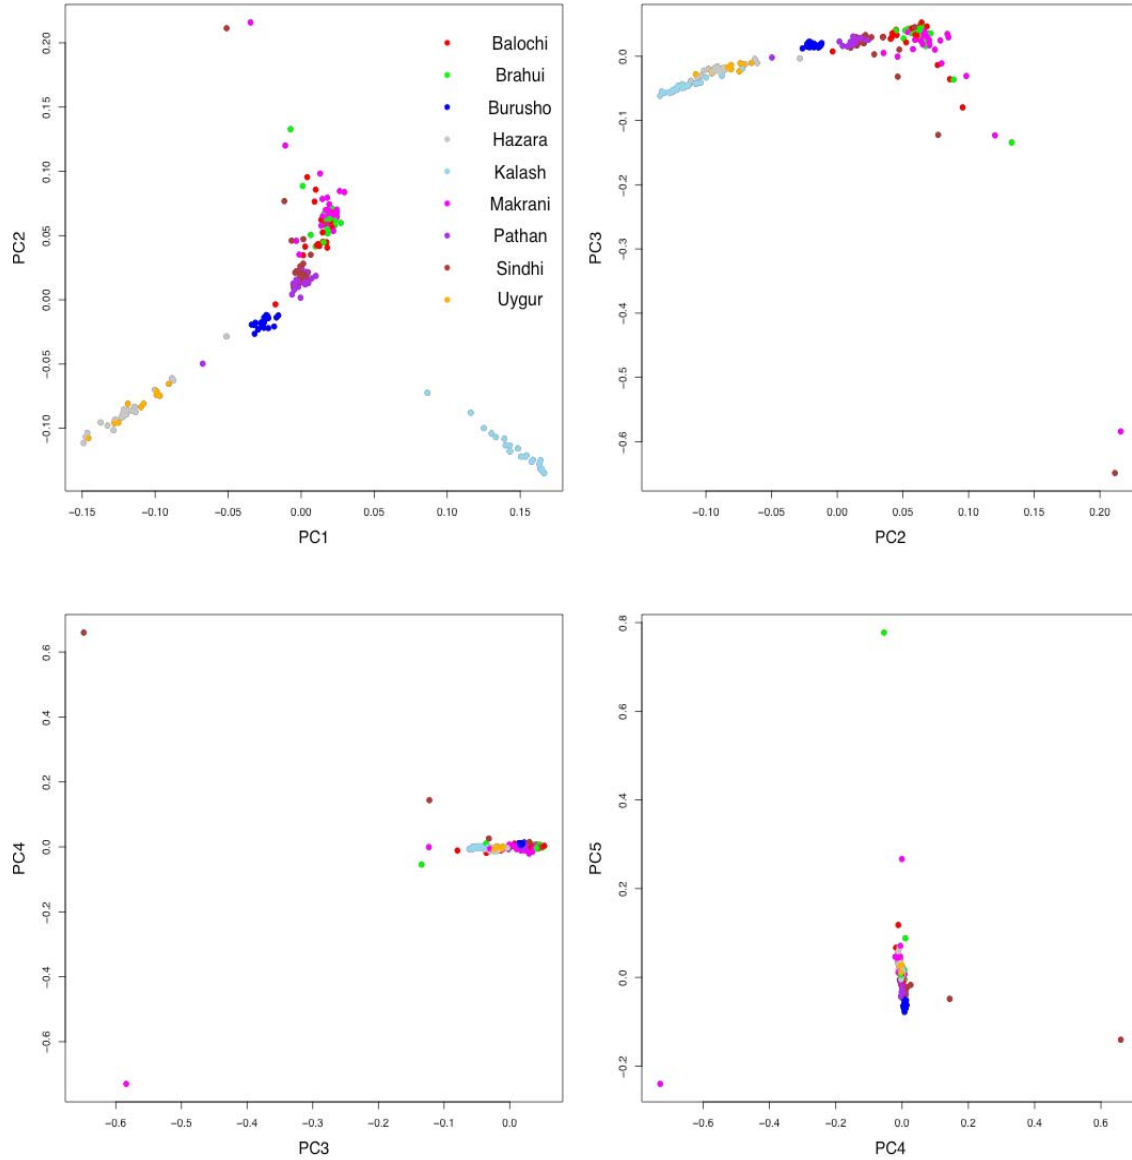

**Figure S3 Intra-continental differentiation within East Asia.** The 229 samples are represented as filled triangles. The top five PCs are plotted with each panel representing a biplot of consecutive PCs.

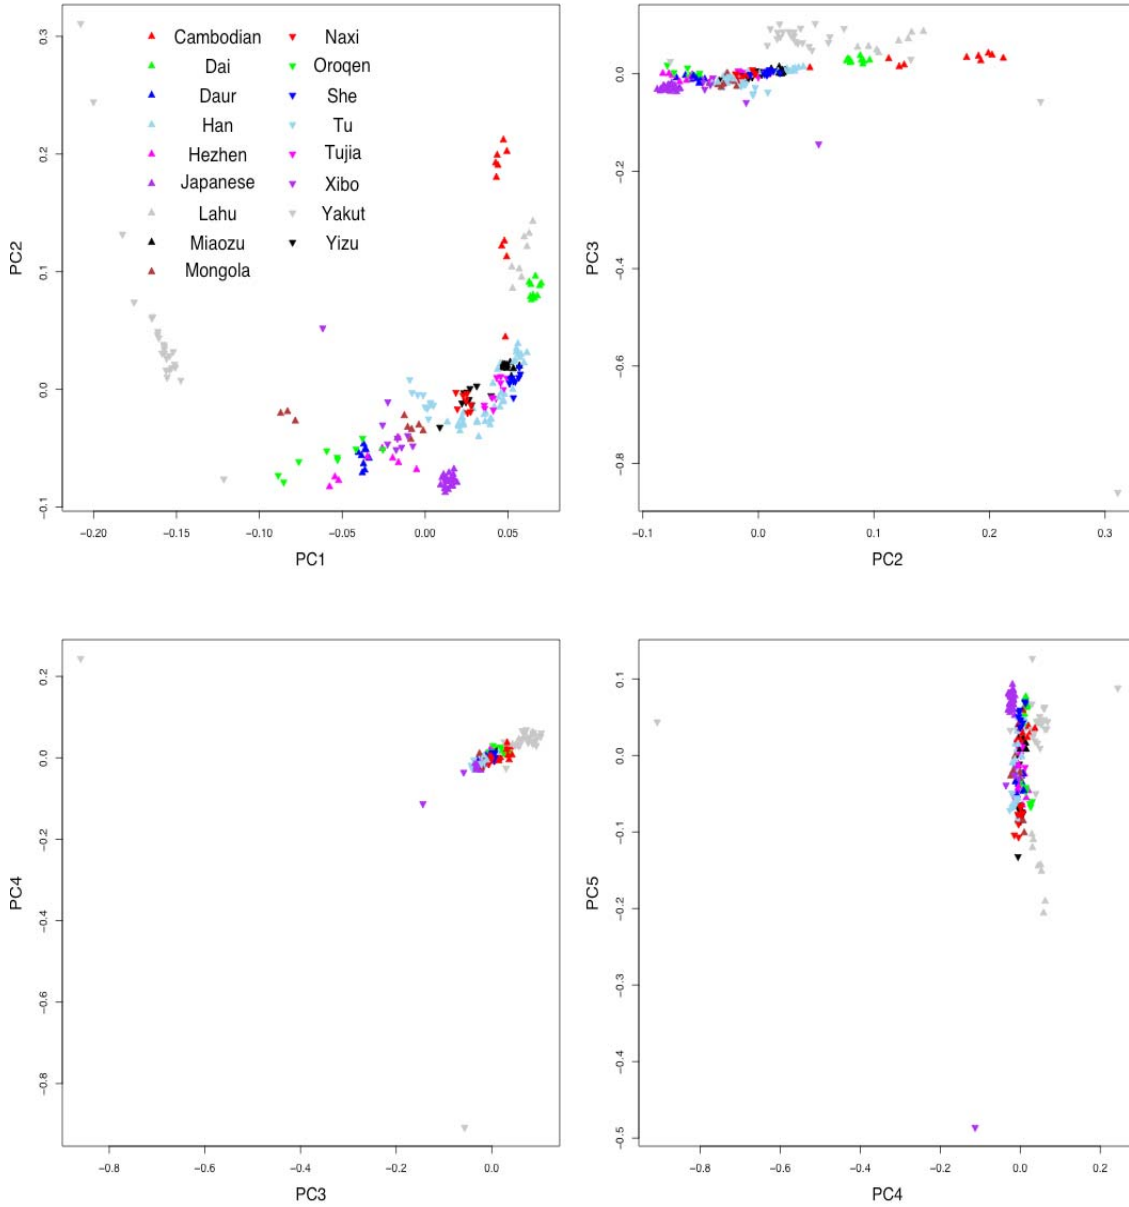

**Figure S4 Intra-continental differentiation within Europe.** The 158 samples are represented as filled circles. The top five PCs are plotted with each panel representing a biplot of consecutive PCs.

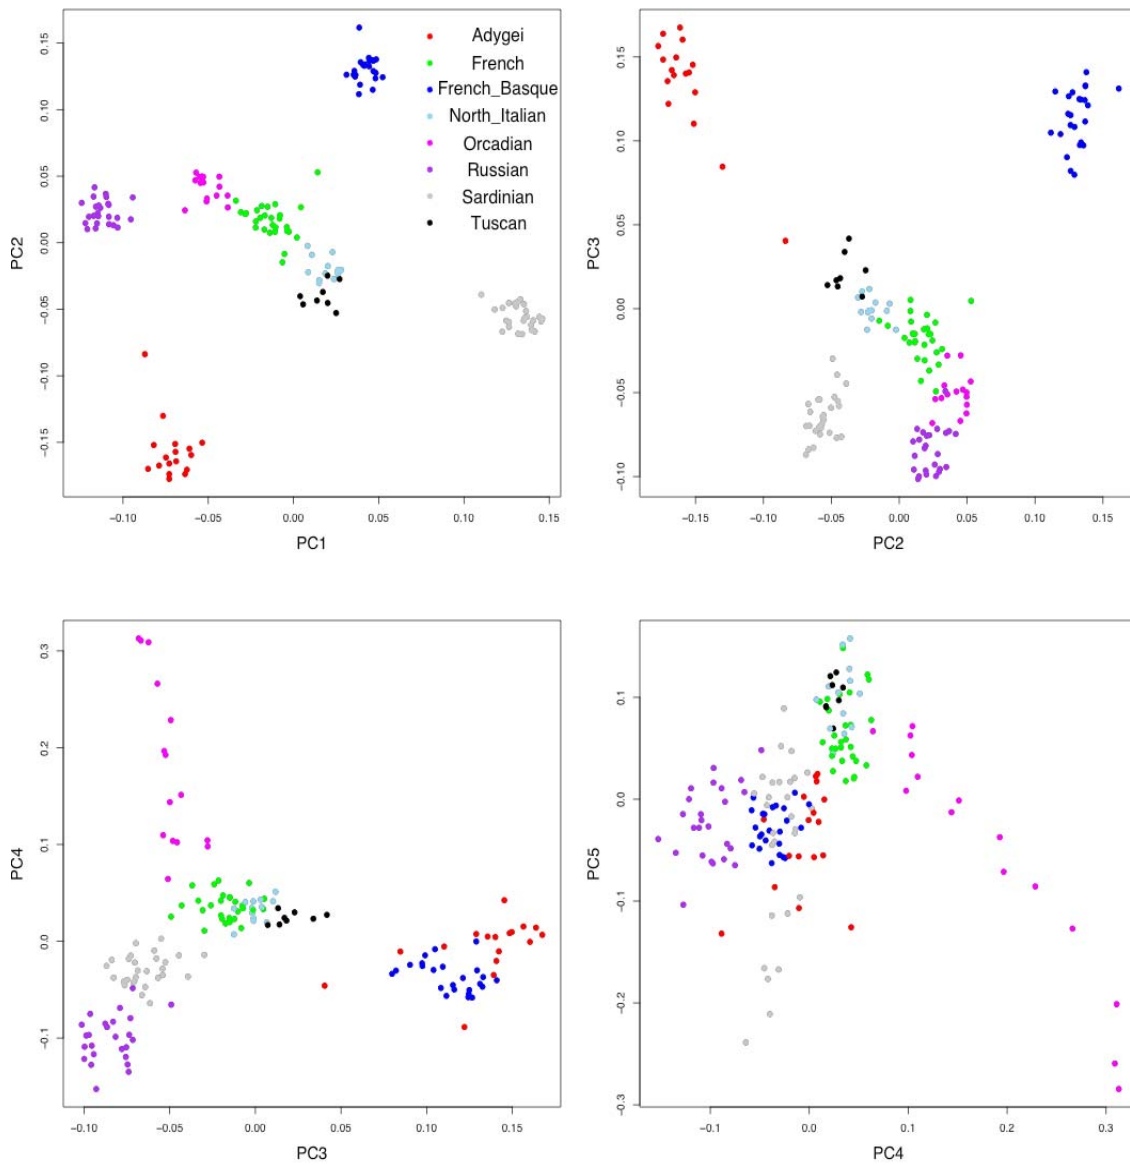

**Figure S5 Intra-continental differentiation within Middle East.** The 162 samples are represented as filled circles. The top five PCs are plotted with each panel representing a biplot of consecutive PCs.

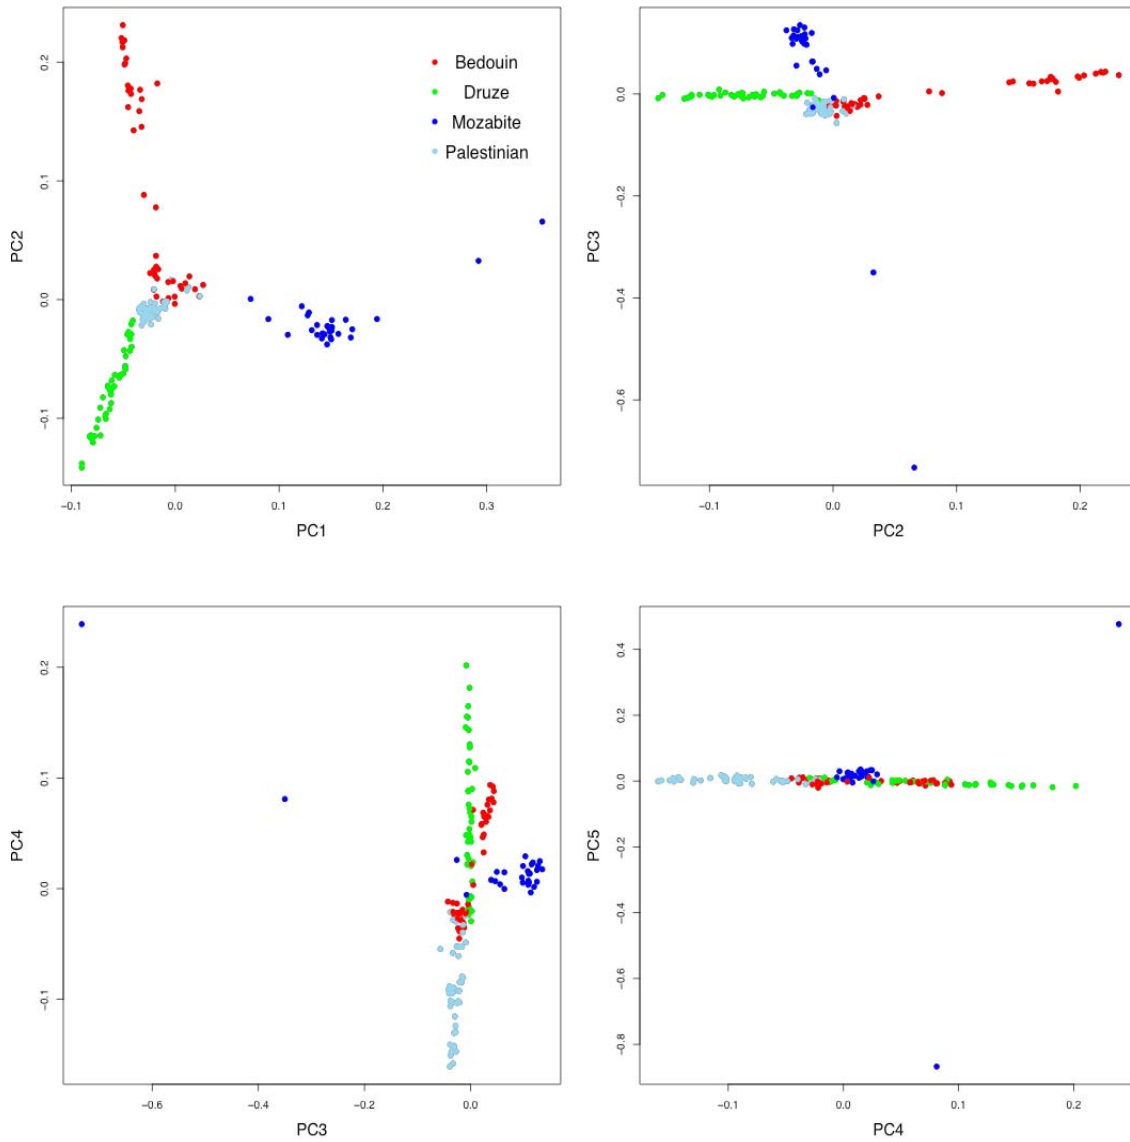

**Figure S6 Intra-continental differentiation within Oceania.** The 28 samples are represented as filled circles. The top five PCs are plotted with each panel representing a biplot of consecutive PCs.

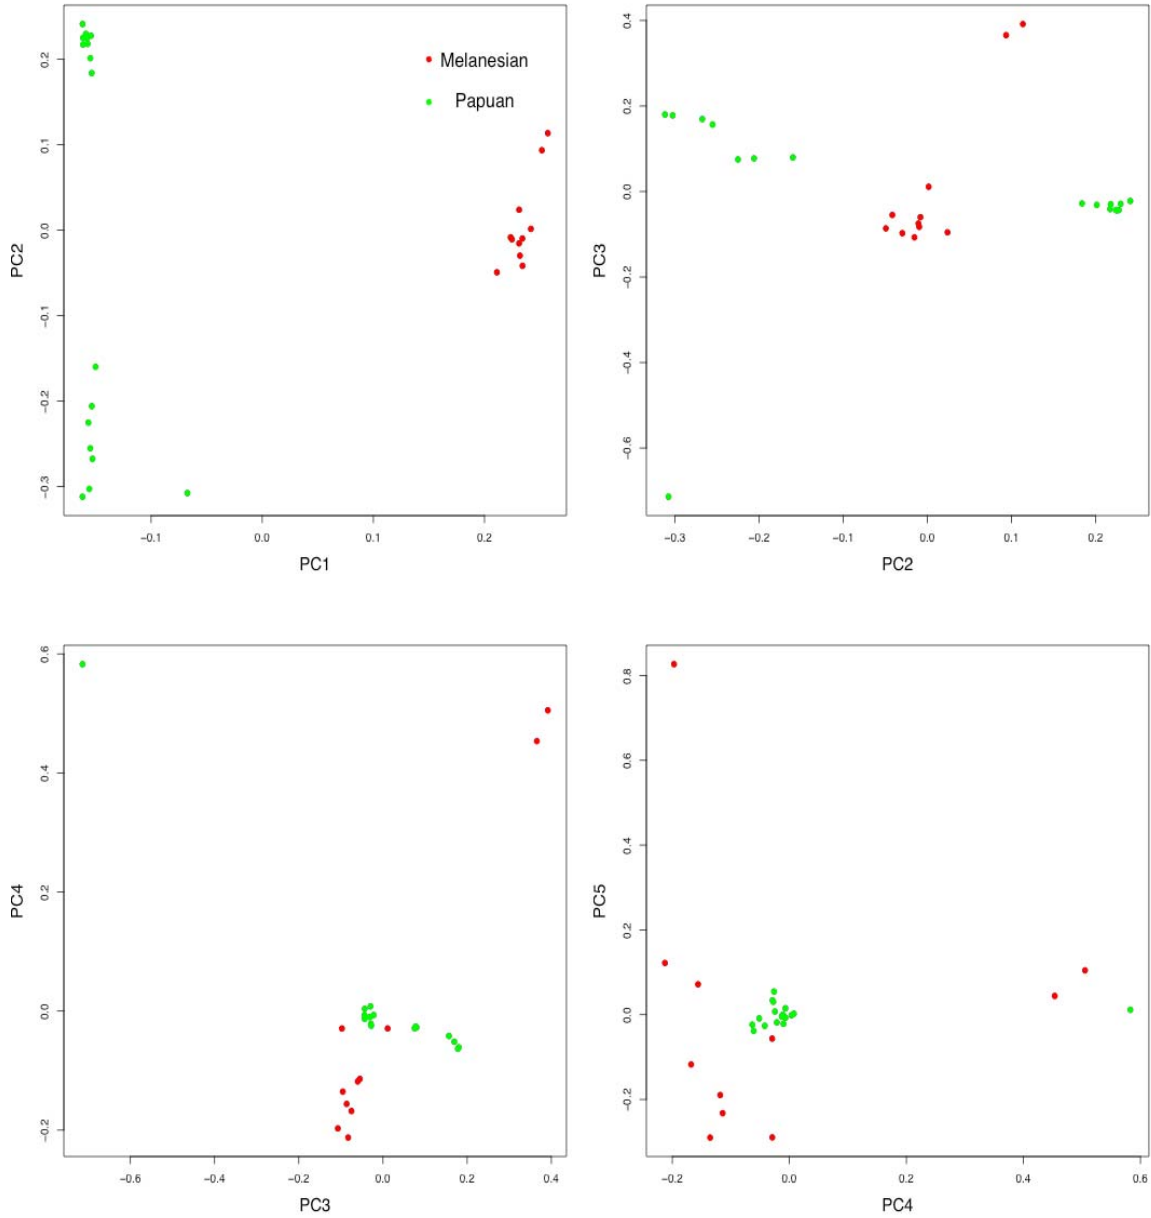

**Figure S7 Cluster analysis of PC1 correlated markers in Africa.** Structure was used to cluster samples into two groups (K=2). 11, 811 correlated markers were used. Red and blue represent the two cluster proportions.

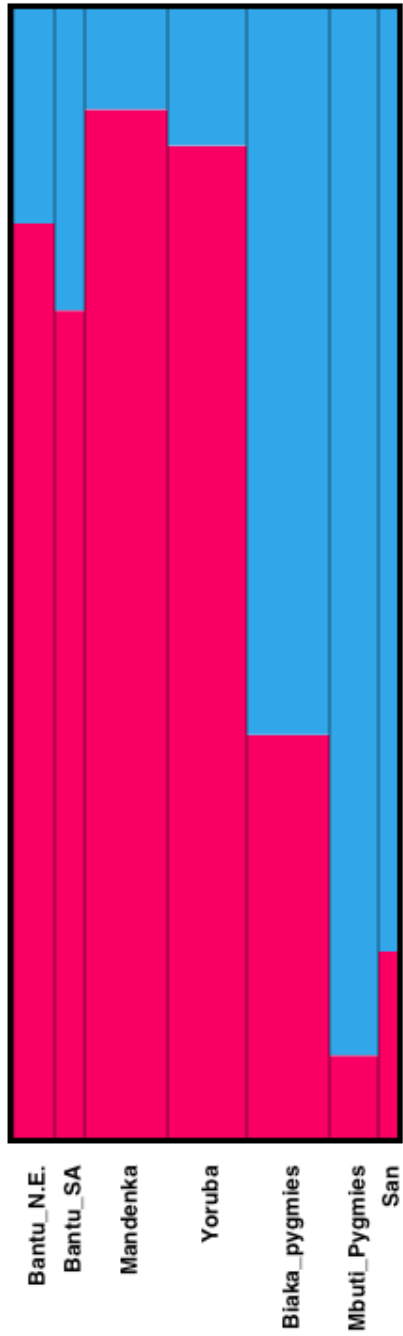

**Figure S8 Cluster analysis of PC2 correlated markers in Africa.** Structure was used to cluster samples into three groups (K=3). 1,446 correlated markers were used. Red, blue and green represent the three cluster proportions.

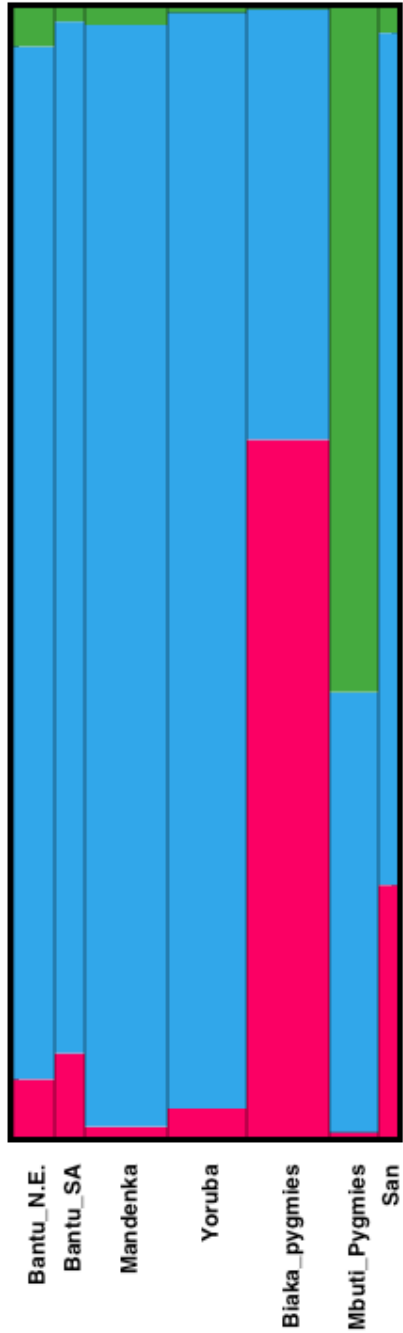



**Table S1. HGDP-CEPH Populations** Details about the sample sizes and population membership of individuals that were included in the analysis.

| Region                | Population    | #<br>Chr |
|-----------------------|---------------|----------|
| Africa                | Bantu_N.E.    | 22       |
|                       | Bantu_SA      | 16       |
|                       | Biaka_pygmies | 44       |
|                       | Mandenka      | 44       |
|                       | Mbuti_Pygmies | 26       |
|                       | San           | 10       |
|                       | Yoruba        | 42       |
| Middle East           | Bedouin       | 90       |
|                       | Druze         | 84       |
|                       | Mozabite      | 58       |
|                       | Palestinian   | 92       |
| Europe                | Adygei        | 34       |
|                       | French        | 56       |
|                       | French_Basque | 48       |
|                       | North_Italian | 26       |
|                       | Orcadian      | 30       |
|                       | Russian       | 50       |
|                       | Sardinian     | 56       |
|                       | Tuscan        | 16       |
| Central/South<br>Asia | Balochi       | 48       |
|                       | Brahui        | 50       |
|                       | Burusho       | 50       |
|                       | Hazara        | 44       |
|                       | Kalash        | 46       |
|                       | Makrani       | 50       |
|                       | Pathan        | 46       |
|                       | Sindhi        | 48       |
| Uyгур                 | 20            |          |
| East Asia             | Cambodian     | 20       |
|                       | Dai           | 20       |
|                       | Daur          | 18       |
|                       | Han           | 88       |
|                       | Hezhen        | 18       |
|                       | Japanese      | 56       |
|                       | Lahu          | 16       |
|                       | Miaozu        | 20       |
|                       | Mongola       | 20       |

|         |            |    |
|---------|------------|----|
|         | Naxi       | 16 |
|         | Oroqen     | 18 |
|         | She        | 20 |
|         | Tu         | 20 |
|         | Tujia      | 20 |
|         | Xibo       | 18 |
|         | Yakut      | 50 |
|         | Yizu       | 20 |
| America | Colombian  | 14 |
|         | Karitiana  | 28 |
|         | Maya       | 42 |
|         | Pima       | 28 |
|         | Surui      | 16 |
| Oceania | Melanesian | 22 |
|         | Papuan     | 34 |

**Table S2. Significance Analysis of PCs** Number of significant PCs ( $p < 0.001$ ) using two different methods

| Continent   | Populations | Method      |       |
|-------------|-------------|-------------|-------|
|             |             | Permutation | ANOVA |
| All         | 52          | 12          | 22    |
| Africa      | 7           | 4           | 5     |
| America     | 5           | 7           | 4     |
| C/S Asia    | 9           | 5           | 4     |
| East Asia   | 17          | 5           | 7     |
| Europe      | 8           | 3           | 4     |
| Middle East | 4           | 5           | 4     |
| Oceania     | 2           | 3           | 1     |
